# Supplementary material
Source: MDPI journal article supplement (https://www.mdpi.com/2073-4433/11/6/663)
Supplement: s1 [file s1]

# Supplementary Materials of Model Hyetographs of Short-Term Rainfall for Wrocław in the Perspective of 2050

**Table S1.** Sewer systems design criteria for sewer flooding threats according to EN 752 from 2017.

| Impact         | Example Locations                                               | Examples of Design Sewer Flooding Frequency |                                        |
|----------------|-----------------------------------------------------------------|---------------------------------------------|----------------------------------------|
|                |                                                                 | Return Period (years)                       | Probability of Exceeding in any 1 year |
| Very low       | Roads or open spaces away from buildings                        | 1                                           | 100%                                   |
| Low            | Agricultural land (depending on land use, e.g. pasture, arable) | 2                                           | 50%                                    |
| Low to medium  | Open spaces used for public amenity                             | 3                                           | 30%                                    |
| Medium         | Roads or open spaces adjacent to buildings                      | 5                                           | 20%                                    |
| Medium to high | Flooding in occupied buildings excluding basements              | 10                                          | 10%                                    |
| High           | Deep flooding in occupied basements or road underpasses         | 30                                          | 3%                                     |
| Very high      | Critical infrastructure                                         | 50                                          | 2%                                     |
